# Supplementary material for: Clopidogrel Plus Aspirin in Patients With Different Types of Single Small Subcortical Infarction
Source: PubMed Central journal article supplement (PMC8039512; doi:10.3389/fneur.2021.631220), 2021-03-29
Supplement: Table_1.pdf [file Table_1.pdf]

**Supplementary Table 1** Baseline characteristics of patients in the CHANCE trial included in the current subgroup analysis or not.

| Characteristics                                      | Not included<br>(n=4,081) | Included<br>(n=1,089)  | P value |
|------------------------------------------------------|---------------------------|------------------------|---------|
| Age (years)                                          | 62.0 (54.6-71.2)          | 63.1 (55.2-71.6)       | 0.048   |
| Women                                                | 1374 (33.7)               | 376 (34.5)             | 0.614   |
| Systolic blood pressure (mmHg)                       | 150.0<br>(135.0-160.0)    | 150.0<br>(140.0-167.0) | <0.001  |
| Diastolic blood pressure (mmHg)                      | 90.0 (80.0-100.0)         | 90.0 (80.0-100.0)      | 0.073   |
| Body mass index (kg/m <sup>2</sup> )                 | 24.5 (22.9-26.6)          | 24.3 (22.5-26.2)       | 0.001   |
| <b>Medical history</b>                               |                           |                        |         |
| Ischaemic stroke                                     | 846 (20.7)                | 187 (17.2)             | 0.009   |
| TIA                                                  | 142 (3.5)                 | 32 (2.9)               | 0.449   |
| Myocardial infarction                                | 77 (1.9)                  | 19 (1.7)               | 0.899   |
| Angina                                               | 155 (3.8)                 | 29 (2.7)               | 0.080   |
| Congestive heart failure                             | 61 (1.5)                  | 19 (1.7)               | 0.580   |
| Known atrial fibrillation or flutter                 | 75 (1.8)                  | 21 (1.9)               | 0.802   |
| Valvular heart disease                               | 10 (0.2)                  | 4 (0.4)                | 0.511   |
| Hypertension                                         | 2689 (65.9)               | 710 (65.2)             | 0.667   |
| Diabetes mellitus                                    | 866 (21.2)                | 227 (20.8)             | 0.802   |
| Hypercholesterolaemia                                | 436 (10.7)                | 137 (12.6)             | 0.082   |
| Pulmonary Embolism                                   | 1 (0.02)                  | 0                      | 1.000   |
| Current or previous smoking                          | 1763 (43.2)               | 458 (42.1)             | 0.513   |
| Time to randomization (hours)                        | 12.0 (6.1-19.5)           | 12.0(7.2-19.5)         | 0.013   |
| Time to randomization, dichotomized                  |                           |                        | 0.811   |
| < 12 hours                                           | 2035 (49.9)               | 538 (49.4)             |         |
| >= 12h hours                                         | 2046 (50.1)               | 551 (50.6)             |         |
| Qualifying event                                     |                           |                        | 0.003   |
| TIA                                                  | 1180 (28.9)               | 265 (24.3)             |         |
| Minor stroke                                         | 2901 (71.1)               | 824 (75.7)             |         |
| Baseline ABCD <sup>2</sup> score for qualifying TIA* | 4 (4-5)                   | 5 (4-5)                | 0.013   |

Data are median (IQR) or number (%).

Statistical analyses were performed by Wilcoxon rank sum tests or chi-square tests.

\*Only for patients recruited to the CHANCE trial with TIA as a qualifying event (n=1,445).

CHANCE trial=the Clopidogrel in High-risk patients with Acute Non-disabling Cerebrovascular Events trial. ICAS=intracranial arterial stenosis. TIA=transient ischaemic attack. ABCD<sup>2</sup> score=a score to predict stroke risk early after a transient ischaemic attack; acronyms: A for age; B, blood pressure; C, clinical features; D2, duration of TIA, and presence of diabetes.

**Supplementary Table 2** Efficacy and safety outcomes of the patients with SSSI.

| Outcomes                                | Mono<br>antiplatelet,<br>n (%) | Dual<br>antiplatelet,<br>n (%) | HR/OR<br>(95% CI) * | <i>P</i><br>Value* |
|-----------------------------------------|--------------------------------|--------------------------------|---------------------|--------------------|
| Efficacy outcomes                       |                                |                                |                     |                    |
| Primary efficacy outcome,<br>stroke     | 16(9.5)                        | 16(9.4)                        | 0.89(0.44-1.81)     | 0.76               |
| Secondary efficacy Outcome <sup>†</sup> |                                |                                |                     |                    |
| Ischemic stroke                         | 16(9.5)                        | 16(9.4)                        | 0.89(0.44-1.81)     | 0.76               |
| Hemorrhagic stroke                      | 0                              | 0                              | NA                  | NA                 |
| Myocardial infarction                   | 0                              | 0                              | NA                  | NA                 |
| Vascular death                          | 0                              | 0                              | NA                  | NA                 |
| Death from any cause                    | 0                              | 0                              | NA                  | NA                 |
| TIA                                     | 3(1.8)                         | 0(0)                           | NA                  | 1.00               |
| Disabling/fatal stroke                  | 18(10.8)                       | 18(10.8)                       | 0.93(0.46-1.88)     | 0.83               |
| Safety outcome                          |                                |                                |                     |                    |
| Bleeding, according to GUSTO            |                                |                                |                     |                    |
| Severe Bleeding                         | 0                              | 2(1.2)                         | NA                  | 1.00               |
| Moderate Bleeding                       | 0                              | 0                              | NA                  | NA                 |
| Mild Bleeding                           | 0                              | 0                              | NA                  | NA                 |
| Any bleeding                            | 4(2.4)                         | 5(2.9)                         | 1.13(0.29-4.35)     | 0.86               |

**Abbreviations:** CI=confidence interval; HR=hazard ratio; OR=odds ratio; GUSTO=Global Utilization of Streptokinase and Tissue Plasminogen Activator for Occluded Coronary Arteries criteria; SSSI = Single small subcortical infarction.

\*Adjusted for age, male, systolic blood pressure, previous history of ischemic stroke, smoking and time to randomization.

<sup>†</sup>Secondary efficacy outcome: new clinical vascular events including ischemic stroke, hemorrhagic stroke, myocardial infarction, or vascular death.
